# Supplementary material for: Enhanced photocatalytic degradation of psychoactive substances using amine-modified elongated titanate nanostructures
Source: Royal Society of Chemistry journal article supplement (doi:10.1039/c7en00882a), 2017-11-28
Supplement: c7en00882a1.pdf [file c7en00882a1.pdf]

**Table S1** – Main products identified by LC-HR-ESI/MS during the photocatalytic degradation of theophylline

| Sl.no. | Product                                  | Mol.wt. | Elemental composition                                       | m/z      |                                                                                       |
|--------|------------------------------------------|---------|-------------------------------------------------------------|----------|---------------------------------------------------------------------------------------|
| ---    | Theophylline                             | 180.16  | C <sub>7</sub> H <sub>8</sub> N <sub>4</sub> O <sub>2</sub> | 181.0727 | 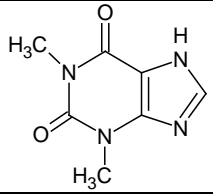   |
| I      | 1,3-Dimethyluric acid                    | 196.16  | C <sub>7</sub> H <sub>8</sub> N <sub>4</sub> O <sub>3</sub> | 197.0675 |    |
| II     | 1-Methylxanthine                         | 166.14  | C <sub>6</sub> H <sub>6</sub> N <sub>4</sub> O <sub>2</sub> | 167.0565 |    |
| III    | 3-Methylxanthine                         | 166.14  | C <sub>6</sub> H <sub>6</sub> N <sub>4</sub> O <sub>2</sub> | 167.0565 |   |
| IV     | 1-Methyluric acid                        | 182.14  | C <sub>6</sub> H <sub>6</sub> N <sub>4</sub> O <sub>3</sub> | 183.0518 |  |
| V      | 3-Methyluric acid                        | 182.14  | C <sub>6</sub> H <sub>6</sub> N <sub>4</sub> O <sub>3</sub> | 183.0518 |  |
| VI     | Xanthine                                 | 152.11  | C <sub>5</sub> H <sub>4</sub> N <sub>4</sub> O <sub>2</sub> | 153.0410 |  |
| VII    | 1/3-Methyltetrahydro-1H-purine-2,6-dione | 168.15  | C <sub>6</sub> H <sub>8</sub> N <sub>4</sub> O <sub>2</sub> | 169.0720 |  |

|      |                                                                                 |        |                                                             |          |                                                                                       |
|------|---------------------------------------------------------------------------------|--------|-------------------------------------------------------------|----------|---------------------------------------------------------------------------------------|
| VIII | 8-Hydroxy-1/3-methyl-3,7,8,9-tetrahydro-1 <i>H</i> -purine-2,6-dione            | 184.15 | C <sub>6</sub> H <sub>8</sub> N <sub>4</sub> O <sub>3</sub> | 185.0669 | 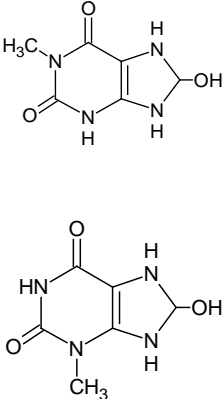   |
| IX   | 5/6-Amino derivative of 1/3-methylpyrimidine-2,4(1 <i>H</i> ,3 <i>H</i> )-dione | 141.13 | C <sub>5</sub> H <sub>7</sub> N <sub>3</sub> O <sub>2</sub> | 142.0611 |    |
| X    | 5/6-Aminopyrimidine-2,4(1 <i>H</i> ,3 <i>H</i> )-dione                          | 127.10 | C <sub>4</sub> H <sub>5</sub> N <sub>3</sub> O <sub>2</sub> | 128.0454 |   |
| XI   | 1/3-Methylpyrimidine-2,4(1 <i>H</i> ,3 <i>H</i> )-dione                         | 126.11 | C <sub>5</sub> H <sub>6</sub> N <sub>2</sub> O <sub>2</sub> | 127.0502 |  |
| XII  | 5,6-Diaminopyrimidine-2,4(1 <i>H</i> ,3 <i>H</i> )-dione                        | 142.12 | C <sub>4</sub> H <sub>6</sub> N <sub>4</sub> O <sub>2</sub> | 143.0563 |  |

**Table S2** – Main products identified by LC-HR-ESI/MS for the photodegradation of caffeine

| Compound        | Formula                                                         | Experimental mass (m/z) | Mol.wt. | structure                                                                             |
|-----------------|-----------------------------------------------------------------|-------------------------|---------|---------------------------------------------------------------------------------------|
| <b>Caffeine</b> | C <sub>8</sub> H <sub>11</sub> N <sub>4</sub> O <sub>2</sub>    | 195.0876                | 194     | 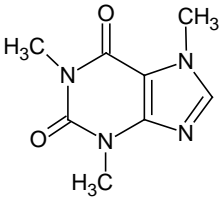   |
| <b>1</b>        | C <sub>8</sub> H <sub>12</sub> N <sub>4</sub> O <sub>4</sub> Na | 251.0751                | 228     |    |
| <b>2</b>        | C <sub>7</sub> H <sub>11</sub> N <sub>4</sub> O <sub>3</sub>    | 199.0824                | 198     |    |
| <b>3</b>        | C <sub>5</sub> H <sub>8</sub> N <sub>2</sub> O <sub>3</sub> Na  | 167.0426                | 144     |   |
| <b>4</b>        | C <sub>6</sub> H <sub>9</sub> N <sub>3</sub> O <sub>4</sub> Na  | 210.0485                | 187     |  |
| <b>5</b>        | C <sub>8</sub> H <sub>11</sub> N <sub>4</sub> O <sub>4</sub>    | 227.0774                | 226     |  |
| <b>6</b>        | C <sub>8</sub> H <sub>10</sub> N <sub>4</sub> O <sub>5</sub> Na | 265.0547                | ---     | ---                                                                                   |
| <b>7</b>        | C <sub>8</sub> H <sub>9</sub> N <sub>4</sub> O <sub>4</sub>     | 225.0620                | ---     | ---                                                                                   |
| <b>8</b>        | C <sub>7</sub> H <sub>10</sub> N <sub>3</sub> O <sub>3</sub>    | 184.0713                | ---     | ---                                                                                   |
| <b>9</b>        | C <sub>5</sub> H <sub>7</sub> N <sub>2</sub> O <sub>2</sub>     | 127.0499                | ---     | ---                                                                                   |
| <b>10</b>       | C <sub>5</sub> H <sub>8</sub> N <sub>3</sub> O <sub>2</sub>     | 142.0609                | ---     | ---                                                                                   |
| <b>11</b>       | C <sub>6</sub> H <sub>8</sub> N <sub>3</sub> O <sub>3</sub>     | 170.0560                | ---     | ---                                                                                   |

**Table S3** – Main products identified by GC-MS for the phenol photocatalytic degradation process

| <b>Product</b> | <b>Mol.wt.</b> | <b>Elemental composition</b> |                                                                                     |
|----------------|----------------|------------------------------|-------------------------------------------------------------------------------------|
| Phenol         | 94             | $C_6H_6O$                    | 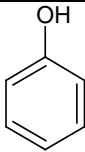 |
| Catechol       | 110            | $C_6H_6O_2$                  |  |
| Hydroquinone   | 110            | $C_6H_6O_2$                  |  |
| Resorcinol     | 110            | $C_6H_6O_2$                  |  |

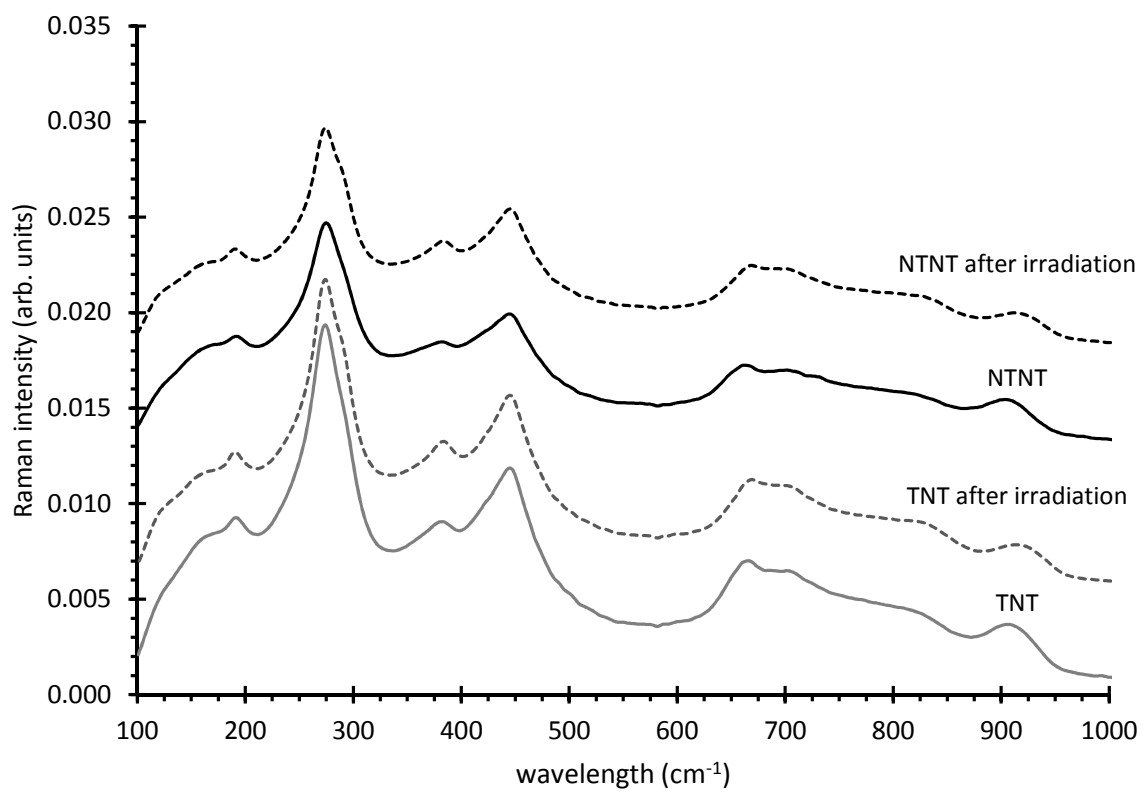

**Figure S1** – Raman spectra of the TNT and NTNT samples before and after being submitted to UV-vis radiation.
